# Supplementary material for: Generation of muscular dystrophy model rats with a CRISPR/Cas system
Source: PubMed Central journal article supplement — Sci Rep. 2014 Jul 9;4:5635. doi: 10.1038/srep05635 (PMC4088098; doi:10.1038/srep05635), 2014-07-09
Supplement: srep05635-s1.pdf [file srep05635-s1.pdf]

## Supplementary information

### Generation of muscular dystrophy model rats with a CRISPR/Cas system

Katsuyuki Nakamura<sup>1</sup>, Wataru Fujii<sup>2</sup>, Masaya Tsuboi<sup>3</sup>, Jun Tanihata<sup>4</sup>, Naomi Teramoto<sup>1</sup>, Shiho Takeuchi<sup>1</sup>, Kunihiko Naito<sup>2</sup>, Keitaro Yamanouchi<sup>1\*</sup> and Masugi Nishihara<sup>1</sup>.

1. Department of Veterinary Physiology, Graduate School of Agricultural and Life Sciences, The University of Tokyo, 1-1-1 Yayoi, Bunkyo-ku, Tokyo 113-8657, Japan

2. Department of Animal Resource Sciences, Graduate School of Agricultural and Life Sciences, The University of Tokyo, 1-1-1 Yayoi, Bunkyo-ku, Tokyo 113-8657, Japan

3. Department of Veterinary Pathology, Graduate School of Agricultural and Life Sciences, The University of Tokyo, 1-1-1 Yayoi, Bunkyo-ku, Tokyo 113-8657, Japan

4. Department of Molecular Therapy, National Institute of Neuroscience, National Center of Neurology and Psychiatry, 4-1-1 Ogawa-Higashi, Kodaira, Tokyo 187-8502, Japan

\*Correspondence to: Keitaro Yamanouchi

E-mail: [akeita@mail.ecc.u-tokyo.ac.jp](mailto:akeita@mail.ecc.u-tokyo.ac.jp)

Tel: +81-3-5841-5387; Fax: +81-3-5841-8017

**Supplementary Fig. 1. Mutations in the rat *Dmd* gene generated by CRISPR/Cas.**

Sequence analyses of detectable F0 male rats in target1 **(a)** and target2 **(b)** loci. Target sequences of gRNAs are labeled in magenta and protospacer adjacent motif (PAM) sequences are labeled in green. Insertions are represented as bold lowercase letters (blue) and mutations are labeled in cyan.

**Supplementary Fig. 2. The same mutation patterns were observed in the tail tips and muscle.**

**(a)** The mutations detected in the tail tip were the same as those detected in the tibialis anterior (TA) muscle. **(b)** F0 rat #9 exhibited overlapping of two types of waveform data from the tail tip near the target1 site, which indicates the occurrence of a mosaic pattern. This overlapping was also detected in the waveform data from the TA muscle. **(c)** The sequences detected by TA cloning from the tail tip and TA muscle.

**Supplementary Fig. 3. Large-scale deletion pattern in the rat *Dmd* gene with the CRISPR/Cas system.**

**(a)** PCR for the rat *Dmd* gene in *Dmd*-mutated F0 rats using the forward primer of the target1 site and the reverse primer of the target2 site. Amplification occurred only in one F0 rat (#3).

**(b)** Sequencing result and waveform data of the PCR products using the forward primer of the target1 site and the reverse primer of the target2 site in F0 rat #3. This mutation pattern was different from that shown in Supplementary Fig. 1, indicating the occurrence of a mosaic pattern in F0 rat #3.

**Supplementary Fig. 4. All *Dmd*-mutated F0 rats exhibited dystrophic phenotypes in the skeletal muscle.**

**(a)** Immunostaining for tibialis anterior (TA) muscles of 13-week-old wild type (WT) and *Dmd*-mutated F0 male rats. The signals of Dystrophin disappeared or were reduced in all of the F0 rats. Scale bar = 100  $\mu$ m. **(b)** Masson's trichrome staining of TA muscles in *Dmd*-mutated F0 rats. Scale bar = 500  $\mu$ m. **(c)** Immunostaining for laminin and embryonic myosin heavy chain (eMHC) in TA muscles of 13-week-old

WT and F0 male rats. The presence of eMHC-positive regenerating myofibers was observed in all of the F0 rats, but not in age-matched WT rats. Scale bar = 100  $\mu$ m.

**Supplementary Fig.5. Immunoblotting and immunostaining with Dys2 antibody in *Dmd*-mutated rats.**

(a) Full-length image of immunoblotting for *Dmd* with Dys2 antibody. Coomassie Brilliant Blue (CBB) staining is shown as a sample processing control. (b) Immunostaining for *Dmd*.

**Supplementary Fig. 6. Slight elongation of the right ventricle in *Dmd*-mutated rats.**

Area plots of right ventricles in wild type (WT; n = 4) and *Dmd*-mutated F0 (n = 10) rats. Bars represent mean values.

**Supplementary Fig. 7. All F1 male rats exhibited phenotypes similar to those of F0 male rats.**

(a) Sequence results of F1 male rats born from *Dmd*-mutated F0 female rats in the target2 locus. The gRNA sequences (magenta) and protospacer adjacent motif (PAM; green) are labeled. Insertions are represented as bold lowercase letters (blue) and conversions are labeled in cyan. (b) Immunostaining for Dystrophin in tibialis anterior (TA) muscles of 4-week-old wild type (WT) and F1 male rats. Scale bar = 100  $\mu$ m. (c) Immunostaining for laminin and embryonic myosin heavy chain (eMHC) in TA muscles of 4-week-old WT and F1 male rats. eMHC-positive regenerating myofibers were observed in all of the F1 rats, but not in age-matched WT rats. (d) Immunostaining for Dystrophin-glycoprotein complex ( $\beta$ -Dystroglycan,  $\alpha$ -sarcoglycan and nNOS) in TA muscles of 4-week-old WT and F1 male rats. Scale bar = 100  $\mu$ m.

**Supplementary Fig. 8. Full-length images of gels and blots.**

Full-length images of gels of RT-PCR for *Dmd* (a) and *Hprt* (b). Water was used as a negative control (NC) instead of cDNA template. Full-length images of immunoblotting for *Dmd* (c) and  $\alpha$ -tubulin (d). Blots for  $\alpha$ -tubulin are shown as a sample processing control. Full-length images of immunoblotting for Perilipin (d)

and  $\alpha$ -tubulin (f). Blots for  $\alpha$ -tubulin are shown as a sample processing control.

**Supplementary Table 1. Generation efficiency of *Dmd*-mutated rats using CRISPR/Cas9.** *Cas9* mRNA and two types of gRNAs targeting *Dmd* were injected into fertile eggs. The resulting pups were used for sequence analyses of the target1 and target2 sites. \*: One rat showed the large-scale deletion pattern.

**Supplementary Table 2. Off-target effects in *Dmd*-mutated rats.**

Potential off-target loci, which have three mismatches to target1 and target2, were examined by sequence analyses in F0 male rats. Mismatches are labeled in magenta. At off-target site 1.3, rats #2, #3, #8, and #10 had the indels detected by the overlapping of waveform data.

**Supplementary Table 3.** List of primers used in this study.

Supplementary Fig.1

**a Target 1**

chrX: 51,878,371-51,878,393

|                      |                                                             |                               |          |
|----------------------|-------------------------------------------------------------|-------------------------------|----------|
| WT                   | 5' CTTATTAATTGAAAGGGTGAAAT//CAGTGACCTGCAGGATGGGAAACGCCTCC   | 3'                            | -162 bp  |
| #1                   | CTTATTAATTG-----//-----GGAAACGCCTCCTGGA                     |                               |          |
| #2, #3: unsuccessful |                                                             |                               |          |
| WT                   | CATAGACAACCTCTTCAGTGACCTGCAGG//AATGAATATTTATATGTGGCTATATAA  |                               | -178 bp  |
| #4                   | CATA-----//-----TGTGGCTATATAA                               |                               |          |
| WT                   | AGTGACCTGCAGGATGGGAAACGCCTCC//ATAATTCATATTACAATTTTCATTTTTG  |                               | -566 bp  |
| #5                   | AGTGAC-----//-----ACAATTTTCATTTTTG                          |                               |          |
| WT                   | AGTGACCTGCAGGATGGGAAACGCCTCC                                | TGGACCTCCTGGAAGCCTGACAGGGCAAA |          |
| #6                   | AGTGACCTGCA-----ACGCCTCCTGGACCTCCTGGAAGCCTGACAGGGCAAA       |                               | -9 bp    |
| #7-1                 | AGTGACCTGC-----TGGACCTCCTGGAAGCCTGACAGGGCAAA                |                               | -18 bp   |
| WT                   | AGTGACCTGCAGGATGGGAAACGCCTCC                                | TGG//TATTTCTTCTTTCTTTCTTTCCCA |          |
| #7-2                 | AGTGACCT-----//-----TCTTTCTTCTTTCTTTCCCA                    |                               | -73 bp   |
| WT                   | AGTGACCTGCAGGATGGGAAACGCCTCC//TTTTTCATTTTTGCATTGTCTATCATGTG |                               | -577 bp  |
| #8                   | AGTGACCTGCA-----//-----TTGCATTGTCTATCATGTG                  |                               |          |
| #9-1                 | AGTGACC-----CCTCCTGGACCTCCTGGAAGCCTGACAGGGCAAA              |                               | -16 bp   |
| #9-2                 | AGTGACCTGC----tggaaAACGCCTCCTGGACCTCCTGGAAGCCTGACAGGGCAAA   |                               | -9/+4 bp |
| #10                  | AGTGACCTGCaggGGATGGGAAACGCCTCCTGGACCTCCTGGAAGCCTGACAGGGCA   |                               | +2 bp    |

**b Target 2**

chrX: 52,203,342-52,203,364

|                  |                                                              |    |         |
|------------------|--------------------------------------------------------------|----|---------|
| WT               | 5' GGAAACTTTGCACAACGTTGGGATAATTTAACCCAAAAACTTGAAAAGAGTTCAGCA | 3' |         |
| #1-1             | GGAAACTTTGCACAACGTTGGGATAATTTAACCCAAAAACTTGAAAAGAGTTCAGCA    |    |         |
| #1-2             | GGAAACTTTGCACA--GTTGGGATAATTTAACCCAAAAACTTGAAAAGAGTTCAGCA    |    | -2 bp   |
| #1-3             | GGAAACTTTGCACAA--GTTGGGATAATTTAACCCAAAAACTTGAAAAGAGTTCAGCA   |    | -1 bp   |
| #2: unsuccessful |                                                              |    |         |
| #3-1             | GGAAACTTTG-----GGGATAATTTAACCCAAAAACTTGAAAAGAGTTCAGCA        |    | -9 bp   |
| #3-2             | GGAAACTTT-----TGGGATAATTTAACCCAAAAACTTGAAAAGAGTTCAGCA        |    | -9 bp   |
| WT               | GGAAACTTTGCACAACGTTGGGATAAT//GTATTGGGAAATTTGTGAAGAGGCAGAT    |    |         |
| #4-1             | GGAAACTTTGCACAACG-----//-----GGGAAATTTGTGAAGAGGCAGAT         |    | -186 bp |
| #4-2             | GGAAACTTT-----GGATAAT//GTATTGGGAAATTTGTGAAGAGGCAGAT          |    | -10 bp  |
| #5               | GGAAACTTTGCAC-----AAAAACTTGAAAAGAGTTCAGCA                    |    | -21 bp  |
| #6               | GGAAACTTTGCACAACGTTGGGATAATTTAACCCAAAAACTTGAAAAGAGTTCAGCA    |    |         |
| #7               | GGAAACTTTGCACAACGTTGGGATAATTTAACCCAAAAACTTGAAAAGAGTTCAGCA    |    |         |
| #8               | GGAAACTTTG-----TTGGGATAATTTAACCCAAAAACTTGAAAAGAGTTCAGCA      |    | -7 bp   |
| #9-1             | GGAAACTTTGCACAACGTTGGGATAATTTAACCCAAAAACTTGAAAAGAGTTCAGCA    |    |         |
| #9-2             | GGAAACTTTGCACAA-----GAGTTCAGCA                               |    | -32 bp  |
| #9-3             | GGAAACTTTGCAGA-----TGGATAATTTAACCCAAAAACTTGAAAAGAGTTCAGCA    |    | -5 bp   |
| #10-1            | GGAAACTTTGCACA-----AATTTAACCCAAAAACTTGAAAAGAGTTCAGCA         |    | -10 bp  |
| #10-2            | GGAAACTTTGCACAAA--TGGGAT---TTAACCCAAAAACTTGAAAAGAGTTCAGCA    |    | -5 bp   |

Supplementary Fig.2

a

|         |                                             |          |        |
|---------|---------------------------------------------|----------|--------|
|         |                                             | Target 1 |        |
| WT      | CAACCTCTTCAGTGACCTGCAGGATGGGAAACGCCTCCTGGAC |          |        |
| #7 tail | CAACCTCTTCAGTGACCTGC-----TGGAC              |          | -18 bp |
| #7 TA   | CAACCTCTTCAGTGACCTGC-----TGGAC              |          | -18 bp |
|         |                                             | Target 2 |        |
| WT      | GGAAACTTTGCACAACGTTGGATAATTTAACCCAAAACTT    |          |        |
| #8 tail | GGAAACTTTG-----TTGGATAATTTAACCCAAAACTT      |          | -7 bp  |
| #8 TA   | GGAAACTTTG-----TTGGATAATTTAACCCAAAACTT      |          | -7 bp  |

b Target 1

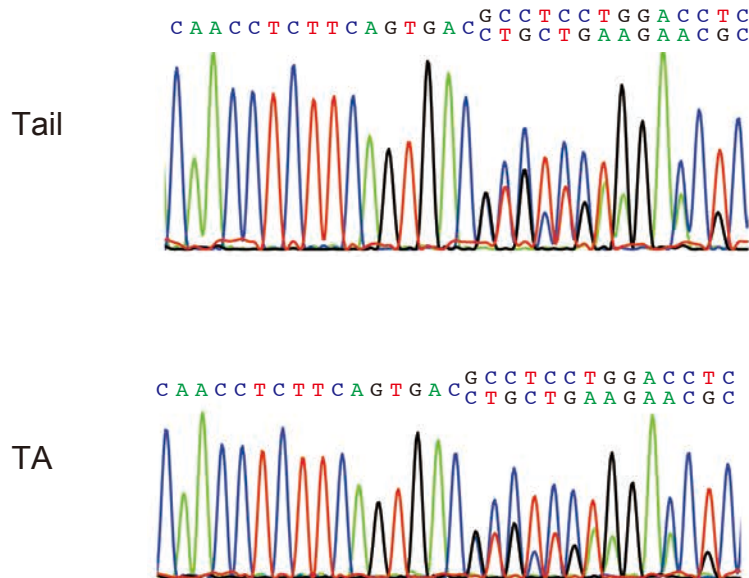

c

|      |      |                                                         |          |
|------|------|---------------------------------------------------------|----------|
|      | WT   | CAACCTCTTCAGTGACCTGCAGGATGGGAAACGCCTCCTGGACCTC          |          |
| Tail | #9-1 | CAACCTCTTCAGTGACC-----CCTCCTGGACCTC                     | -16 bp   |
|      | #9-2 | CAACCTCTTCAGTGACCTGC---- <i>tggaa</i> AACGCCTCCTGGACCTC | -9/+5 bp |
|      | WT   | CAACCTCTTCAGTGACCTGCAGGATGGGAAACGCCTCCTGGACCTC          |          |
| TA   | #9-1 | CAACCTCTTCAGTGACC-----CCTCCTGGACCTC                     | -16 bp   |
|      | #9-2 | CAACCTCTTCAGTGACCTGC---- <i>tggaa</i> AACGCCTCCTGGACCTC | -9/+5 bp |

Supplementary Fig.3

a

Forward primer [chrX: 51,878,006-51,878,030]

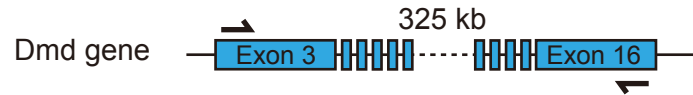

Reverse primer [chrX: 52,203,605-52,203,629]

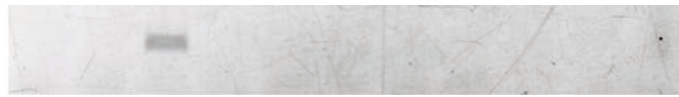

#1 #2 #3 #4 #5 #6 #7 #8 #9 #10 WT

Dmd KO F0

b #3

-324,981 bp

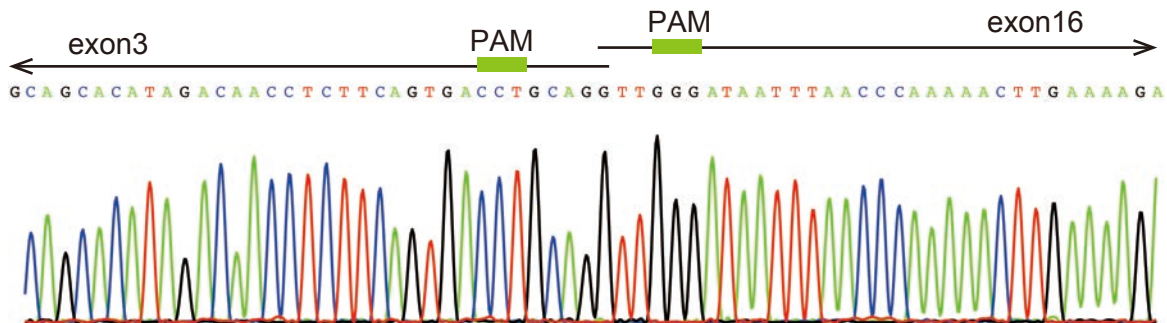

Supplementary Fig.4

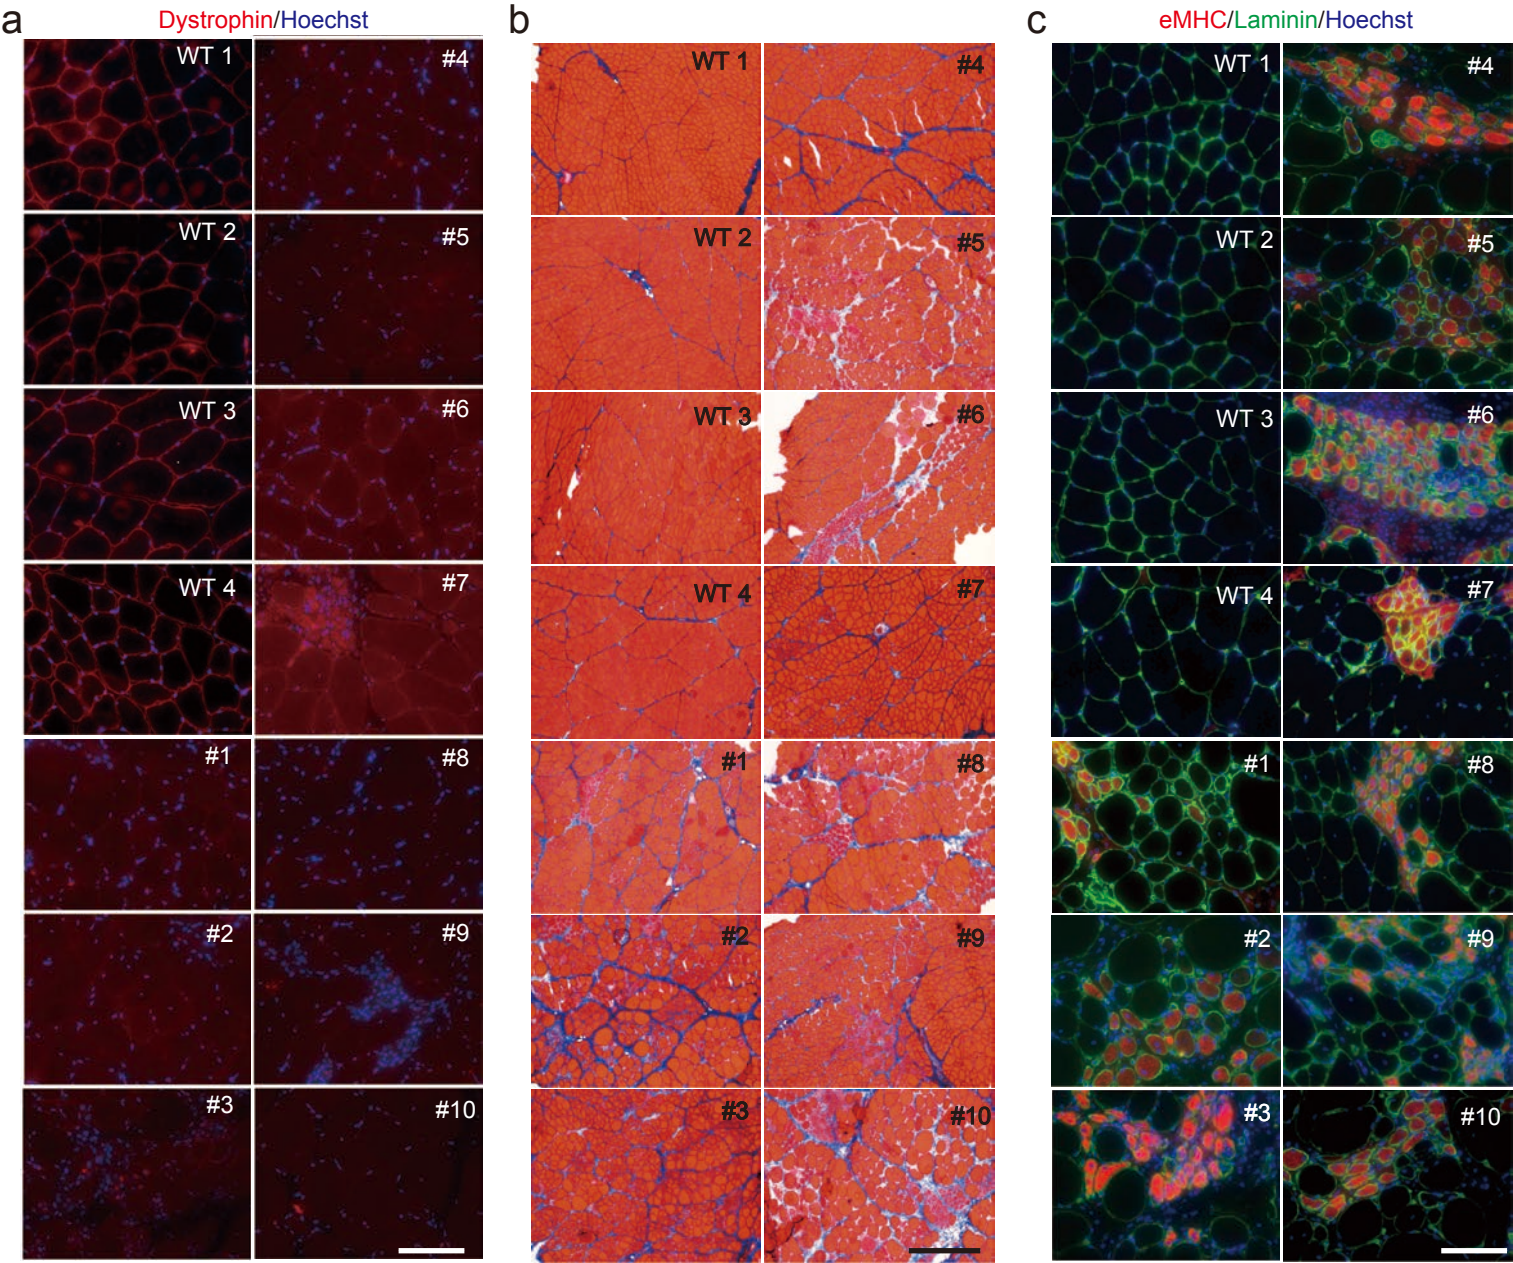



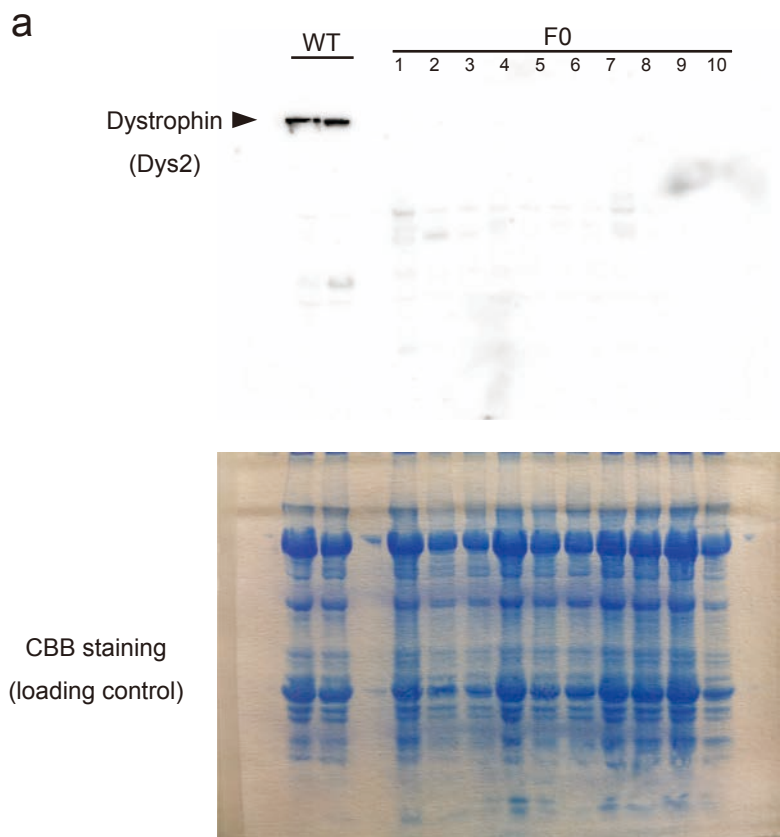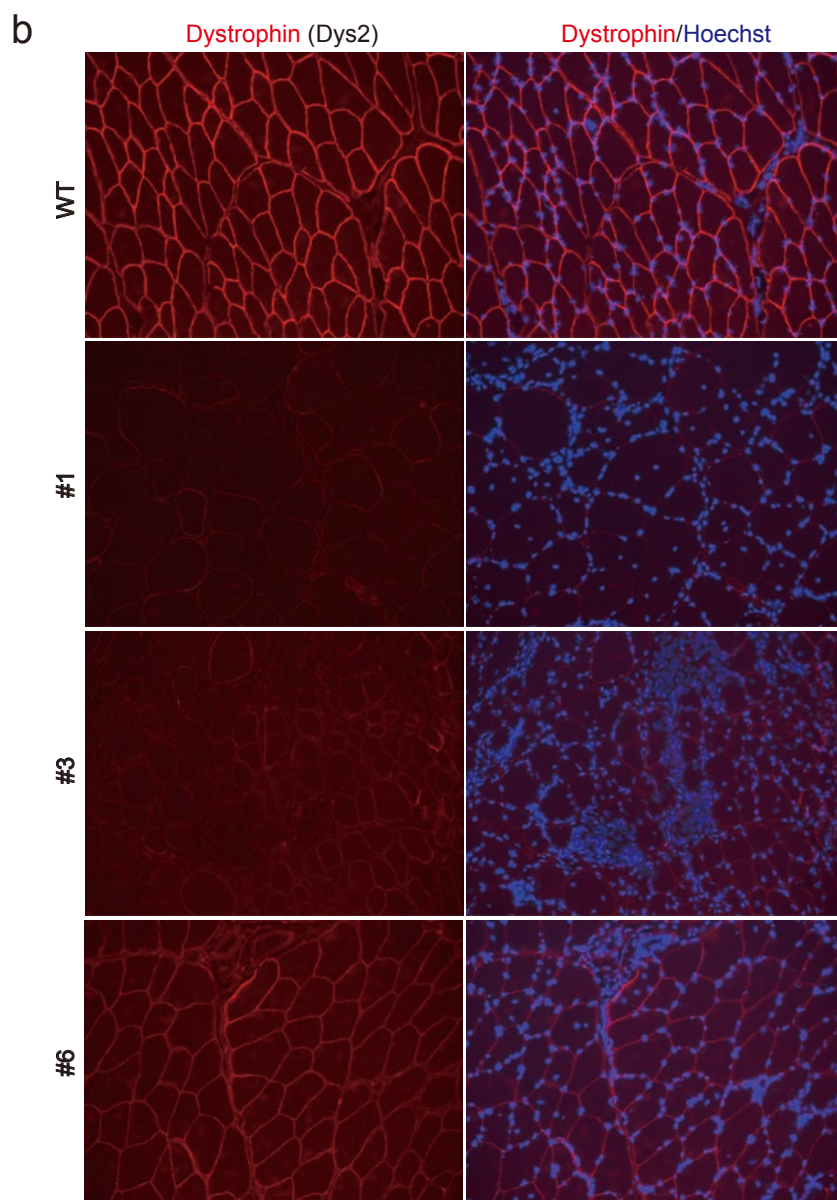

Supplementary Fig.6

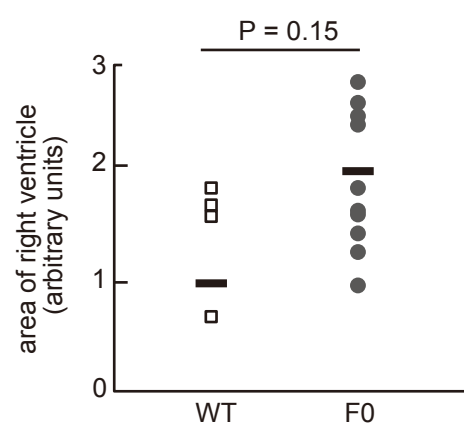

Supplementary Fig.7

**a**

|                    |                      |        |           |
|--------------------|----------------------|--------|-----------|
|                    | Target2              | PAM    |           |
| GTGGAT             | GGAAAACCTTGCACAACGTT | GGG    | GATAA     |
| WT                 |                      |        |           |
| GTGGATGGAAAACCTTGG | -----                | GGATAA | F0 mother |
| GTGGATGGAAAACCTTGG | -----                | GGATAA | #1        |
| GTGGATGGAAAACCTTGG | -----                | GGATAA | #2        |
| *****              |                      | *****  |           |

  

|                                    |              |
|------------------------------------|--------------|
| GTGGATGGAAAACCTTGCACA-ACGTTGGGATAA | WT           |
| GTGGATGGAAAACCTTGCACA              | tAATTGGGATAA |
| #3                                 |              |
| GTGGATGGAAAACCTTGCACA              | tAATTGGGATAA |
| #4                                 |              |
| GTGGATGGAAAACCTTGCACA              | tAATTGGGATAA |
| #5                                 |              |
| *****                              | * *****      |

**b**

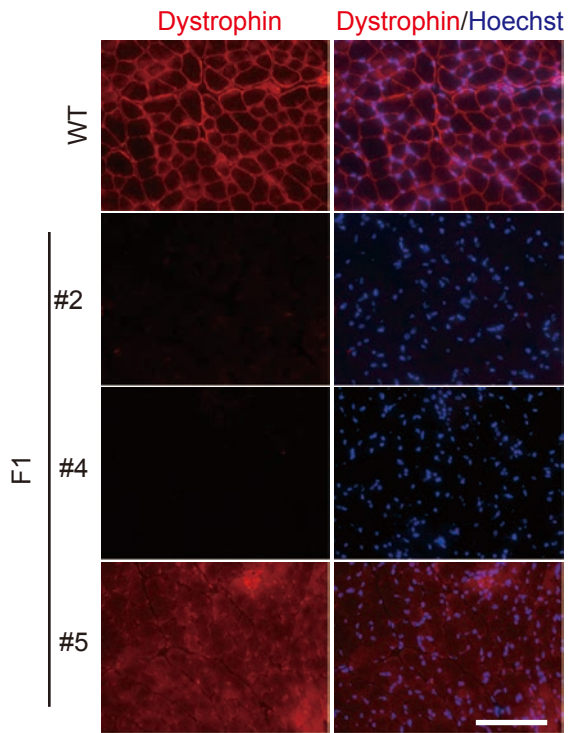

**c**

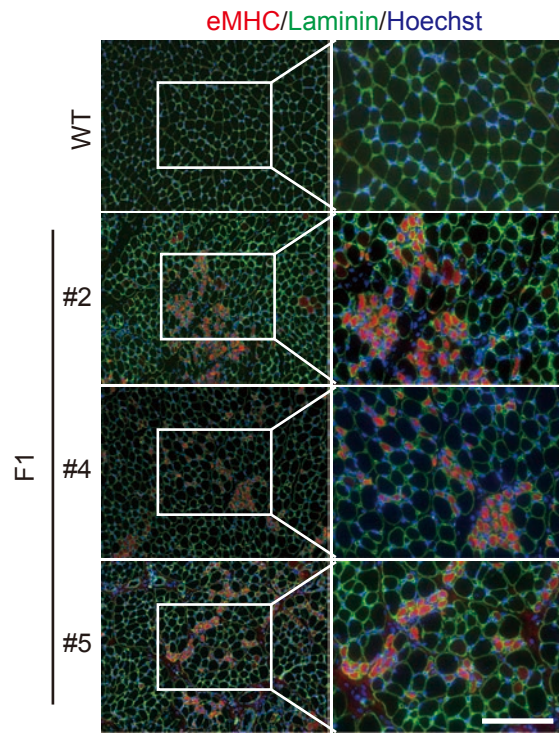

**d**

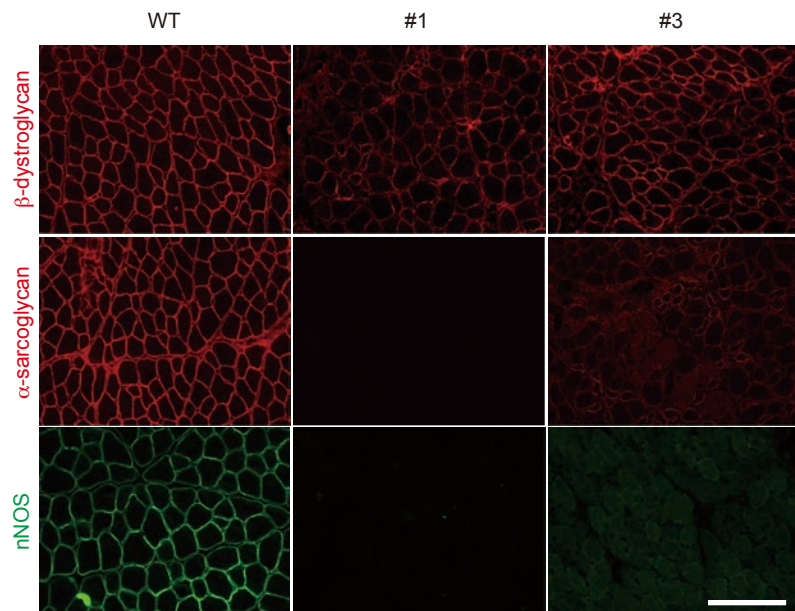

Supplementary Fig.8

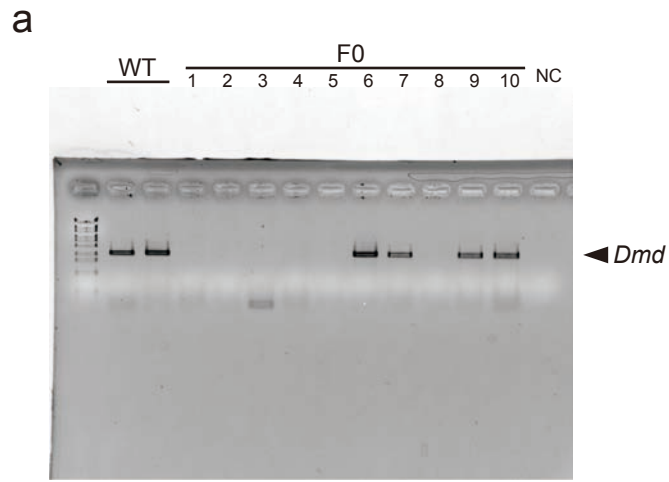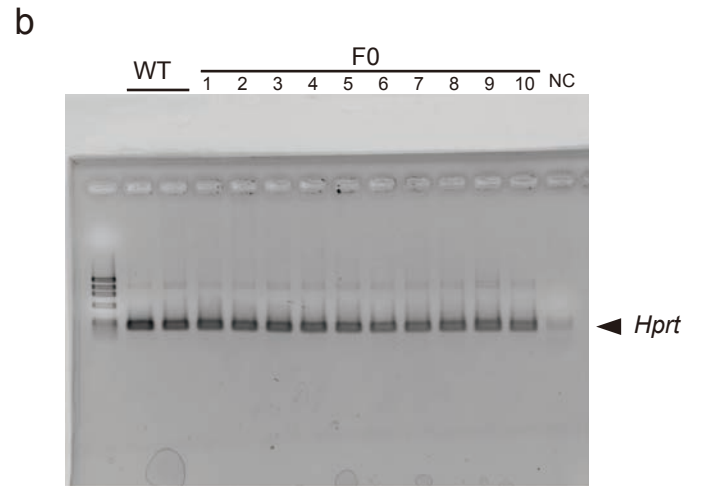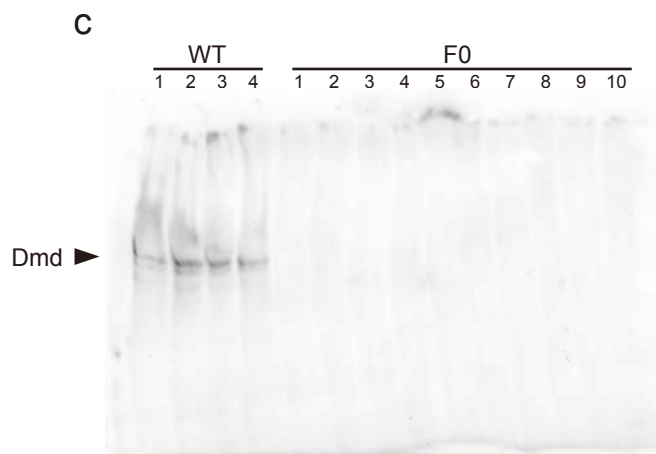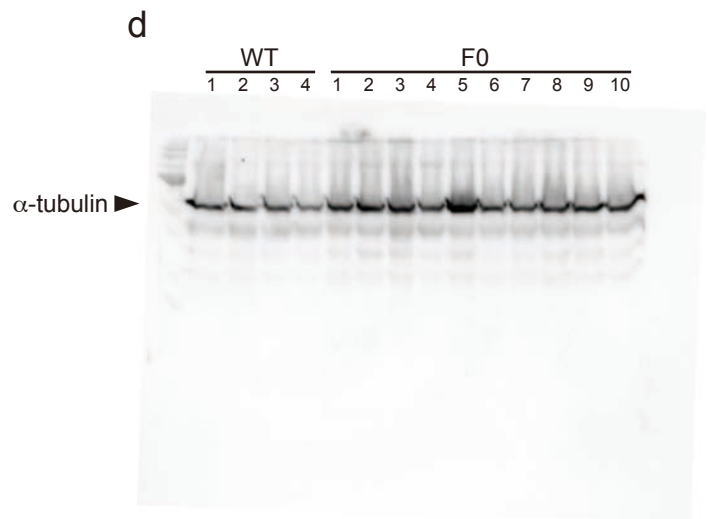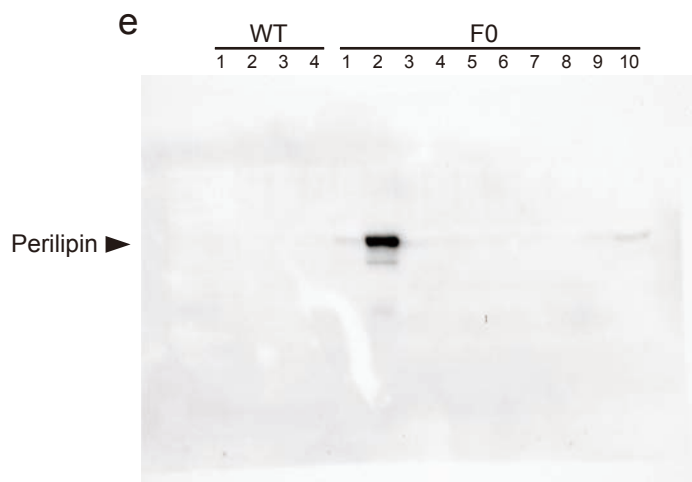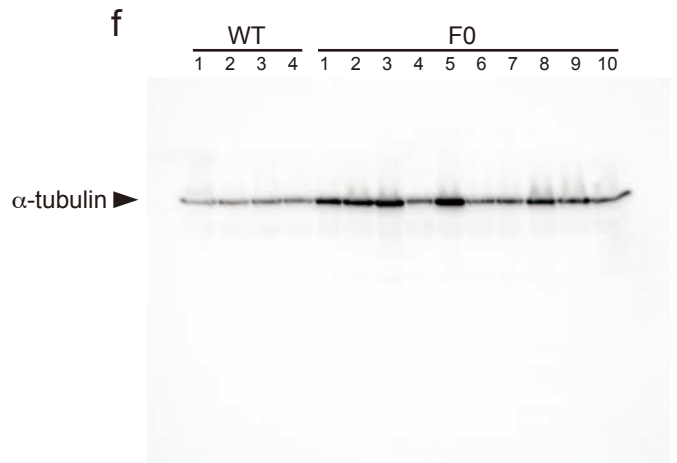

Supplementary Table 1

| <b>Generation efficiency of <i>Dmd</i>- mutated rats using CRISPR/Cas9</b> |                          |         |                               |         |                                       |
|----------------------------------------------------------------------------|--------------------------|---------|-------------------------------|---------|---------------------------------------|
| males/newborns                                                             | detectable/newborn males |         | mutant allele/detectable rats |         | double mutated rats<br>/newborn males |
|                                                                            | target1                  | target2 | target1                       | target2 |                                       |
| 10/17                                                                      | 8/10                     | 9/10    | 8/8                           | 7/9     | 5/10*                                 |

\*One rat had the large-scale deletion.

Supplementary Table 2

|     | sequence of off-target   | locus                          | No. of mutated F0 male rats |
|-----|--------------------------|--------------------------------|-----------------------------|
| 1.1 | CCTGCAGGATGGGAAAGGCATCT  | chr14: 80,131,101-80,131,123   | 0/10                        |
| 1.2 | CCTGCAGGCTGGCCAACGCCTCC  | chr20: 14,437,218-14,437,240   | 0/10                        |
| 1.3 | CCTGCAGGATGGGAAACACCAGC  | chr8: 60,483,929-60,483,951    | 4/10                        |
| 1.4 | CCAGCAGGAAGGGAAACCCCTTC  | chr8: 50,757,345-50,757,367    | 0/10                        |
| 1.5 | CCTGCAGGCTGGGCAACGCCTTC  | chr2: 135,597,810-135,597,832  | 0/10                        |
| 1.6 | CCAGCAGGAAGGGAAATGGCTCC  | chr6: 1,082,237-1,082,259      | 0/10                        |
| 1.7 | CCTGCAGGATGGGACACTCCACC  | chr10: 57,594,822-57,594,844   | 0/10                        |
| 1.8 | CCTGCAGGACTGGAAATGCCTCC  | chr13: 102,121,427-102,121,449 | 0/10                        |
| 2.1 | GGAAAACCTCTGCACAACCCTTGG | chr18: 41,820,912-41,820,934   | 0/10                        |
| 2.2 | AGAAAAGTTTGCACAACTTTGGG  | chr9: 117,853,303-117,853,325  | 0/10                        |
| 2.3 | GGCTAACTTTGCACAATGTTGGG  | chr11: 31,967,242-31,967,264   | 0/10                        |
| 2.4 | GGTAACCTTTGCACAACGTTTGT  | chr15: 2,132,713-2,132,735     | 0/10                        |
| 2.5 | GGCAAACTTTGCACAACATTGGC  | chr1: 94,964,610-94,964,632    | 0/10                        |
| 2.6 | GGAAACCTTTGCACAAAGATGGG  | chr2: 260,132,982-260,133,004  | 0/10                        |

Supplementary Table 3

| Target    | Forward                       | Reverse                        |                                |
|-----------|-------------------------------|--------------------------------|--------------------------------|
| target 1  | For #1, #4                    | 5' -AGTTTCCATCAATAGCCATACCAA   | 5' -TCTCAGTGTACAAGTGTGACGAACA  |
|           | For #5                        | 5' -TATTGATGCACACTATCTCCCTTGA  | 5' -AGGAGGCAAGTGAGAGATAGGATTT  |
|           | For #8                        | 5' -ATCGAAGTGCTGAAAAGAATCTCAT  | 5' -TATAACCATGTTTTCTCTCCCAAA   |
|           | For others                    | 5' -AAAAGGAGAACAGGAGTTTTTGAAT  | 5' -TACAGTAGCTGAGTCAATGAGGTTG  |
| target 2  | 5' -GAATACCTTTGGGTGTGACTGTATC | 5' -TACAGTTTTCCATTTCTGAAGAACC  |                                |
| target 1  | off-target1.1                 | 5' -CCCACTTCATAGATGAGAACACTGA  | 5' -CTGTAGCCAGGAAGTAAAGCTGTGT  |
|           | off-target1.2                 | 5' -CCTCCTATAACAACCCACATGTTTCT | 5' -TACATATCTTCCAGCCAGTGATCT   |
|           | off-target1.3                 | 5' -AGGTCCCATCTCCTAGTCTCAAAGT  | 5' -TTCTTAGAAGTCTGATCCTGGCAGT  |
|           | off-target1.4                 | 5' -TAACACGAGCACAGGCAATTTATTA  | 5' -GCTTCTCTCTTTACACCACCACATT  |
|           | off-target1.5                 | 5' -TCACCGACCTAACATGTAAATCAAA  | 5' -GTGCAATGCTGATACATAATACACAA |
|           | off-target1.6                 | 5' -AAAAAGGAAGGGTAAATAGCACGAC  | 5' -ACCCTTGACTGAGAACACATATT    |
|           | off-target1.7                 | 5' -TGGCTAGTACATCAAGGTCTCTTGG  | 5' -CTTCTCATTACTCAGACCCAAAAA   |
|           | off-target1.8                 | 5' -AATACGACCTAGGTTAGGTGGGAAG  | 5' -ACTCCCATACAGGTGCTATCAAGAG  |
| target 2  | off-target2.1                 | 5' -ACTCAATTTTGACTGAAGACCAACC  | 5' -CATGCTCTTCCGGTAGGAGATAGTA  |
|           | off-target2.2                 | 5' -GCTACTTCACGTCAAATGAGTGGTA  | 5' -GCATAGGACTAGGAAGACATCCAGA  |
|           | off-target2.3                 | 5' -TTCTTTTCGACTGCCTTCATGATATT | 5' -GGAGCGTTTCATATGTGAGATGAGAT |
|           | off-target2.4                 | 5' -AAAAAGGTTCTCATTCCCAAGTAGC  | 5' -TGAAAATGACACAGAAAGAAATGAA  |
|           | off-target2.5                 | 5' -TAAGTGGTTTCAAACCCCTAAGCTC  | 5' -GGCTTAAGTGGACAATCATTCAACT  |
|           | off-target2.6                 | 5' -AAACAGACGTAGCCTTCTCAGGTAA  | 5' -GCGTGACACATATTTCTATCCTGTG  |
| Dmd mRNA  | 5' -AAAGCAACACATAGACAACCTCTTC | 5' -GTTTTACCATGATTTGTTCCCTTGT  |                                |
| Hprt mRNA | 5' -GCTGGTGAAAAGGACCTCT       | 5' -CACAGGACTAGAACRYCTGC       |                                |
